# Supplementary material for: Asymmetric fabric supercapacitor with a high areal energy density and excellent flexibility
Source: Royal Society of Chemistry journal article supplement (doi:10.1039/c7ra08703a), 2017-01-01
Supplement: c7ra08703a1.pdf [file c7ra08703a1.pdf]

**Table S1.** Comparisons on conductivity between this work and the available conducting polymer-coated fabrics, carbon nanomaterial-coated fabrics and carbon nanomaterial/conducting polymer hybrid-coated fabrics.

| No. | Materials                    | Conductivity<br>(S m <sup>-1</sup> ) | Ref.      |
|-----|------------------------------|--------------------------------------|-----------|
| 1   | PPy-coated cotton fabric     | 2.25                                 | [1]       |
| 2   | PPy-coated linen fabric      | 1.5                                  | [1]       |
| 3   | PPy-coated viscose fabric    | 2.18                                 | [1]       |
| 4   | PPy-coated PET fabric        | 0.95                                 | [1]       |
| 5   | PPy-coated cotton fabric     | 615                                  | [2]       |
| 6   | PPy-coated cotton fabric     | 303                                  | [3]       |
| 7   | PPy-coated fabric            | 10                                   | [4]       |
| 8   | PPy-coated cotton fabric     | 580                                  | [5]       |
| 9   | PEDOT:PSS-coated fabric      | 171                                  | [6]       |
| 10  | PANI-coated PET fabric       | 0.685                                | [7]       |
| 11  | CNT-coated cotton fabric     | 0.356                                | [8]       |
| 12  | rGO-coated fabric            | 5.22                                 | [9]       |
| 13  | CNT-coated PET fabric        | 26.15                                | [7]       |
| 14  | PANI/CNT-coated PET fabric   | 38.77                                | [7]       |
| 15  | PPy/rGO-coated cotton fabric | 120                                  | [10]      |
| 16  | PPy/GO-coated cotton fabric  | 22                                   | [11]      |
| 17  | PPy-coated cotton fabric     | 52.24                                | This work |
| 18  | CNT/rGO-coated cotton fabric | 38.64                                | This work |

PPy: polypyrrole; PEDOT:PSS: poly(3,4-ethylene-dioxythiophene):poly(styrene-4-sulfonate); PANI: polyaniline; CNT: carbon nanotube; rGO: reduced graphene oxide; PET: polyethylene terephthalate.

**Table S2.** Comparisons on the areal energy density between this work and the reported flexible supercapacitors (including asymmetric and symmetric supercapacitors).

| No. | Materials                                                                    | Areal energy density<br>( $\mu\text{Wh cm}^{-2}$ ) | Ref.      |
|-----|------------------------------------------------------------------------------|----------------------------------------------------|-----------|
| 1   | Carbon/CNT                                                                   | 9.8                                                | [12]      |
| 2   | CNT                                                                          | 0.0306                                             | [13]      |
| 3   | VOPO <sub>4</sub> /graphene                                                  | 1.7                                                | [14]      |
| 4   | CuCo <sub>2</sub> O <sub>4</sub> /MnO <sub>2</sub>                           | 99                                                 | [15]      |
| 5   | Mn <sub>3</sub> (PO <sub>4</sub> ) <sub>2</sub> ·3H <sub>2</sub> O /graphene | 0.17                                               | [16]      |
| 6   | Graphene/CNT                                                                 | 3.84                                               | [17]      |
| 7   | Graphene // MnO <sub>2</sub> /graphene/carbon                                | 18.1                                               | [18]      |
| 8   | Al/Carbon/MnO <sub>2</sub>                                                   | 35.2                                               | [19]      |
| 9   | Graphene/PANI                                                                | 1.5                                                | [20]      |
| 10  | Carbon // NiCo <sub>2</sub> O <sub>4</sub> /carbon                           | 9.46                                               | [21]      |
| 11  | MnO <sub>2</sub>                                                             | 1.9                                                | [22]      |
| 12  | PEDOT:PSS // RuO <sub>2</sub> /PEDOT:PSS                                     | 0.053                                              | [23]      |
| 13  | PPy/carbon                                                                   | 52                                                 | [24]      |
| 14  | PPy                                                                          | 7.5                                                | [25]      |
| 15  | Carbon // CoMoO <sub>4</sub> /Co(OH) <sub>2</sub>                            | 167.5                                              | [26]      |
| 16  | AC // PANI                                                                   | 185                                                | [27]      |
| 17  | MnO <sub>2</sub> /CNT                                                        | 35                                                 | [28]      |
| 18  | CNT/rGO // PPy                                                               | 260                                                | This work |

CNT: carbon nanotube; MnO<sub>2</sub>: manganese dioxide; VOPO<sub>4</sub>: vanadyl phosphate; Mn<sub>3</sub>(PO<sub>4</sub>)<sub>2</sub>·3H<sub>2</sub>O: manganese phosphate; PANI: polyaniline; PEDOT:PSS: poly(3,4-ethylene-dioxythiophene):poly(styrene-4-sulfonate); RuO<sub>2</sub>: ruthenium oxide; PPy: polypyrrole; CoMoO<sub>4</sub>: cobalt molybdate; Co(OH)<sub>2</sub>: cobalt hydroxide; AC: activated carbon; rGO: reduced graphene oxide.

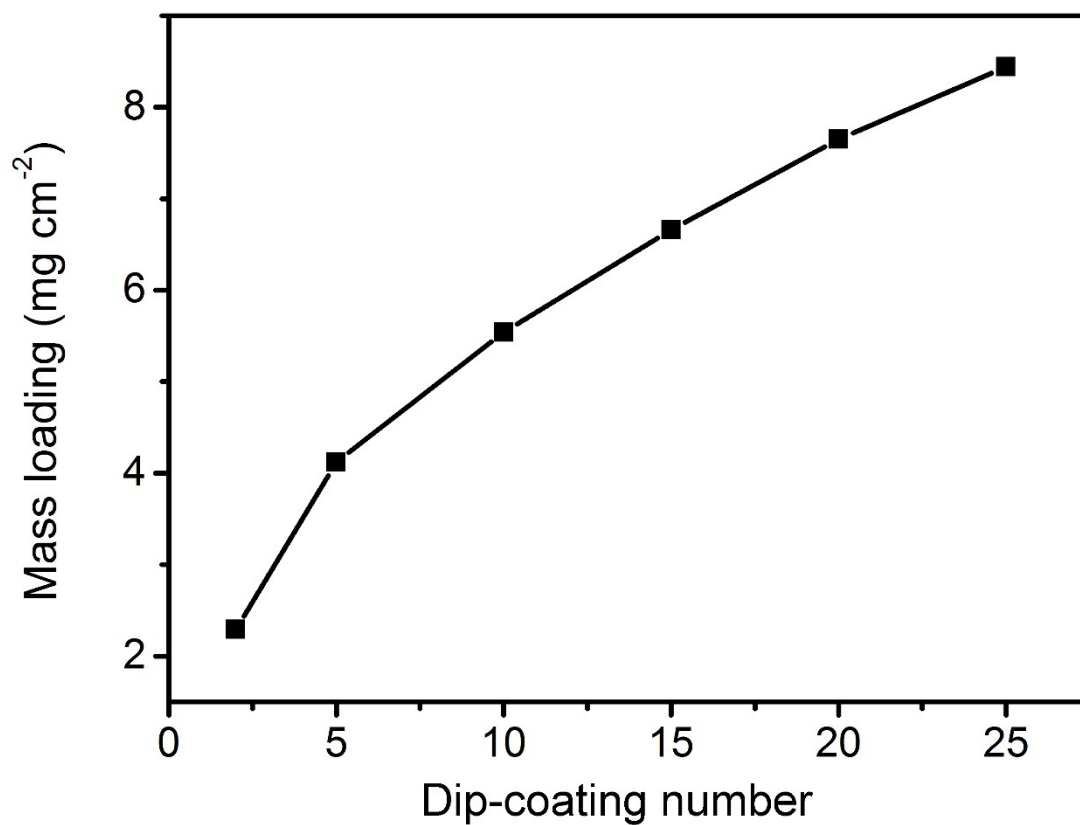

**Figure S1.** CNT/rGO-coated cotton fabric. Dependence of the mass loading of CNT/rGO on the dip-coating number.

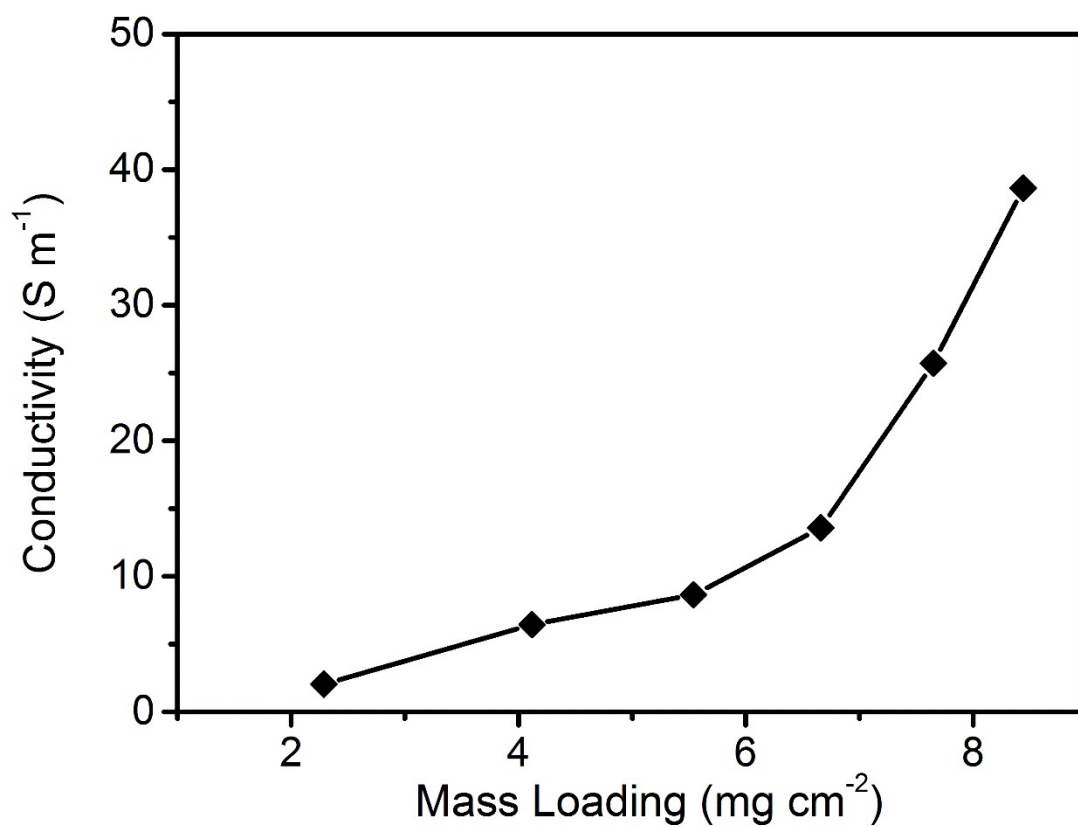

**Figure S2.** Dependence of the conductivity of CNT/rGO-coated cotton fabric on the mass loading of CNT/rGO.

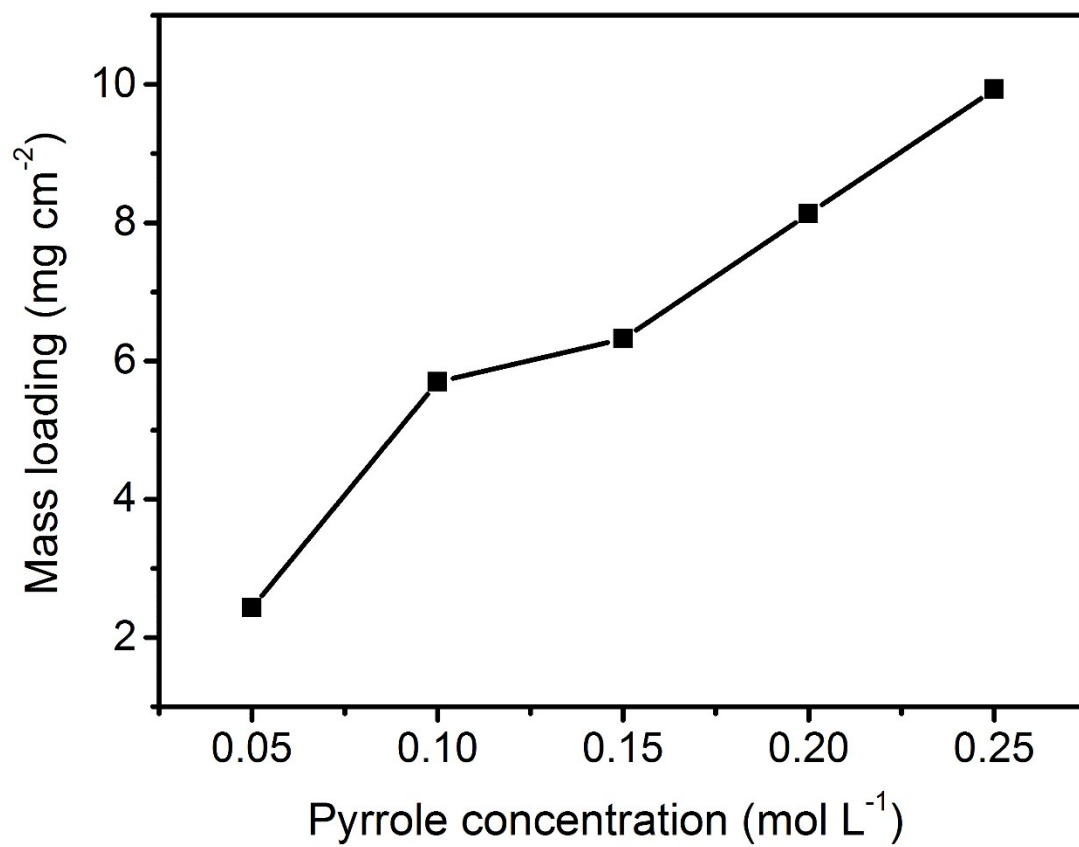

**Figure S3.** PPy-coated cotton fabric. Dependence of the mass loading of PPy on the pyrrole concentration.

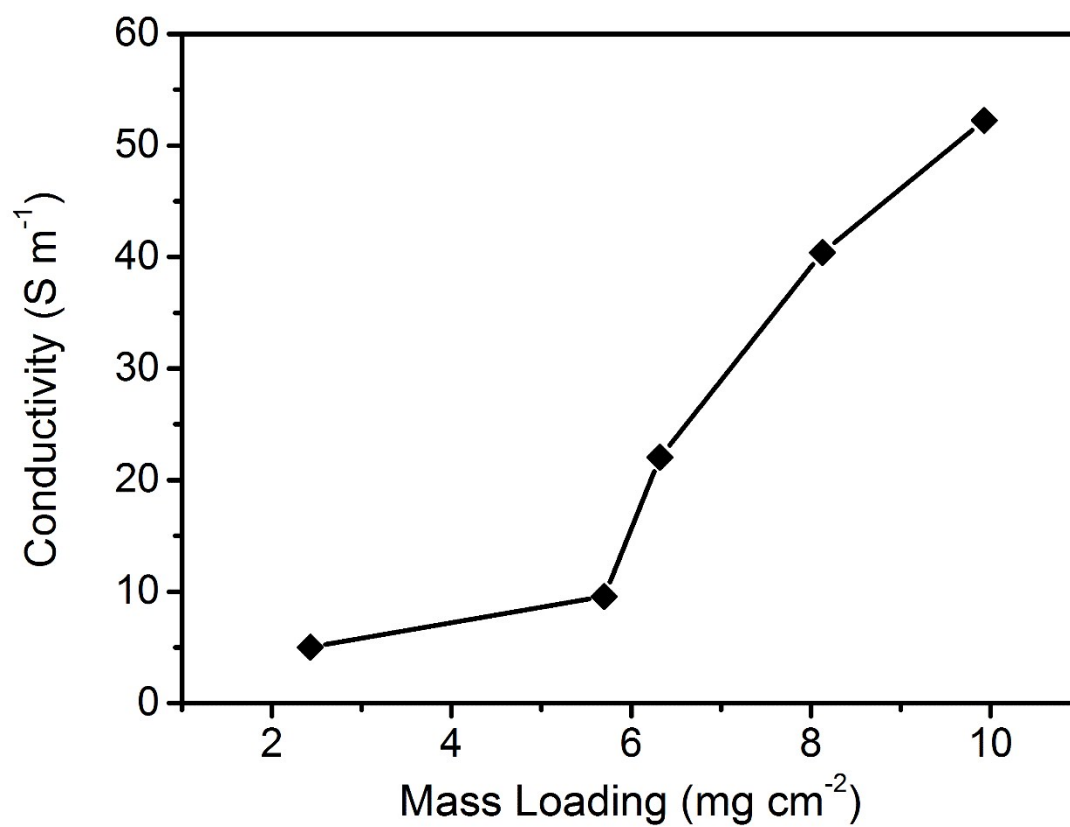

**Figure S4.** Dependence of the conductivity of PPy-coated cotton fabric on the mass loading of PPy.

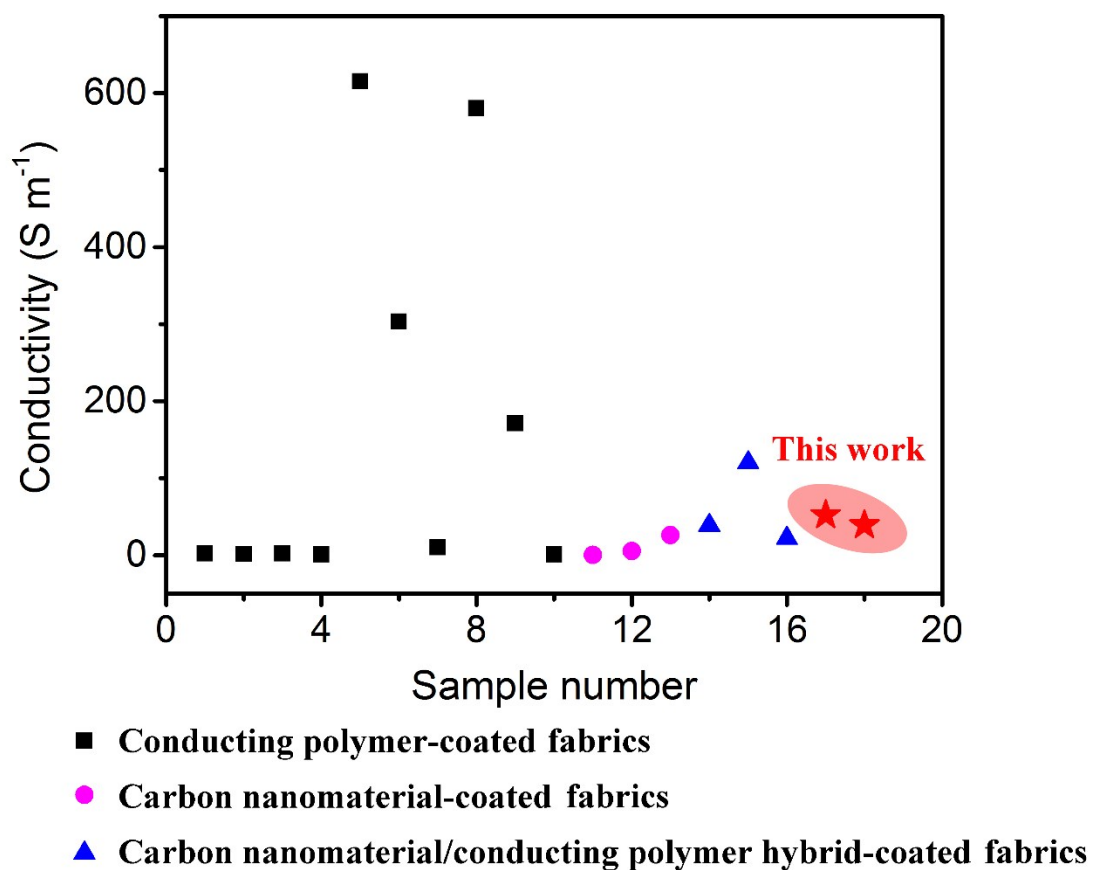

**Figure S5.** Comparisons on conductivity between this work and the available conducting polymer-coated fabrics, carbon nanomaterial-coated fabrics and carbon nanomaterial/conducting polymer hybrid-coated fabrics.

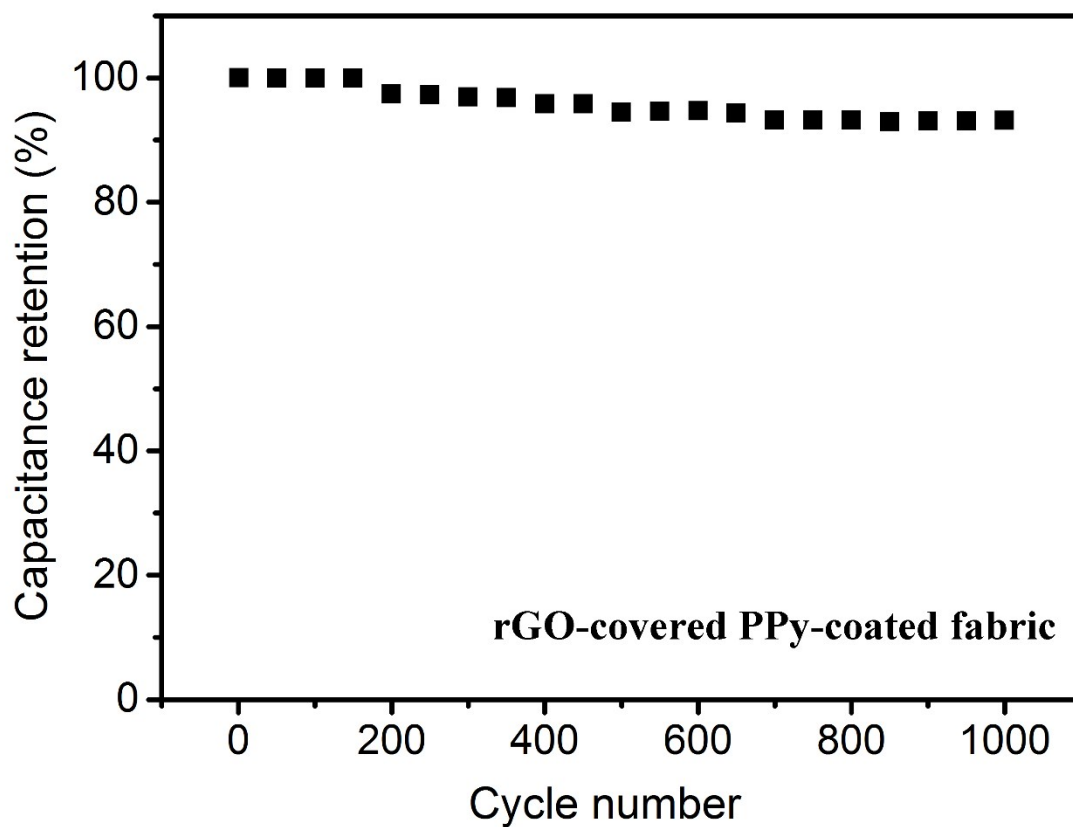

**Figure S6.** The long-life performance of rGO-covered PPy-coated cotton fabric. The current density is  $4 \text{ mA cm}^{-2}$ . The sample was prepared by coating an rGO layer on the PPy-coated cotton fabric.



## References for the Supporting Information

- 1 K. Firoz Babu, S. P. Siva Subramanian and M. Anbu Kulandainathan, *Carbohydr. Polym.*, 2013, **94**, 487-495.
- 2 J. Xu, D. Wang, L. Fan, Y. Yuan, W. Wei, R. Liu, S. Gu and W. Xu, *Org. Electron.*, 2015, **26**, 292-299.
- 3 L. Zhu, L. Wu, Y. Sun, M. Li, J. Xu, Z. Bai, G. Liang, L. Liu, D. Fang and W. Xu, *RSC Adv.*, 2014, **4**, 6261-6266.
- 4 Y. Egami, K. Suzuki, T. Tanaka, T. Yasuhara, E. Higuchi and H. Inoue, *Synth. Met.*, 2011, **161**, 219-224.
- 5 M. Lu, R. Xie, Z. Liu, Z. Zhao, H. Xu and Z. Mao, *J. Appl. Polym. Sci.*, 2016, **133**, 43601.
- 6 Y. Ding, M. A. Invernale and G. A. Sotzing, *ACS Appl. Mater. Interfaces*, 2010, **2**, 1588-1593.
- 7 F. C. R. Ramirez, P. Ramakrishnan, Z. P. Flores-Payag, S. Shanmugam and C. A. Binag, *Synth. Met.*, 2017, **230**, 65-72.
- 8 L. Li, T. Fan, R. Hu, Y. Liu and M. Lu, *Cellulose*, 2017, **24**, 1121-1128.
- 9 H. Zhang, J. Cao, W. Wu, Z. Cao and H. Ma, *Cellulose*, 2016, **23**, 3761-3770.
- 10 J. Xu, D. Wang, Y. Yuan, W. Wei, L. Duan, L. Wang, H. Bao and W. Xu, *Org. Electron.*, 2015, **24**, 153-159.
- 11 F. Yaghoubidoust, D. H. B. Wicaksono, S. Chandren and H. Nur, *J. Mol. Struct.*, 2014, **1075**, 486-493.
- 12 V. T. Le, H. Kim, A. Ghosh, J. Kim, J. Chang, Q. A. Vu, D. T. Pham, J. H. Lee, S. W. Kim and Y. H. Lee, *ACS Nano*, 2013, **7**, 5940-5947.
- 13 C. S. Lee and J. Bae, *J. Korean Phys. Soc.*, 2013, **63**, 2190-2193.
- 14 C. Wu, X. Lu, L. Peng, K. Xu, X. Peng, J. Huang, G. Yu and Y. Xie, *Nat. Commun.*, 2013, **4**, 2431.
- 15 Q. Wang, J. Xu, X. Wang, B. Liu, X. Hou, G. Yu, P. Wang, D. Chen and G. Shen, *ChemElectroChem*, 2014, **1**, 559-564.
- 16 C. Yang, L. Dong, Z. Chen and H. Lu, *J. Phys. Chem. C*, 2014, **118**, 18884-18891.
- 17 L. Kou, T. Huang, B. Zheng, Y. Han, X. Zhao, K. Gopalsamy, H. Sun and C. Gao, *Nat. Commun.*, 2014, **5**, 3754.
- 18 Z. Zhang, F. Xiao and S. Wang, *J. Mater. Chem. A*, 2015, **3**, 11215-11223.
- 19 S. He, R. Zhang, C. Zhang, M. Liu, X. Gao, J. Ju, L. Li and W. Chen, *J. Power Sources*, 2015, **299**, 408-416.
- 20 X. B. Zang, X. Li, M. Zhu, X. M. Li, Z. Zhen, Y. J. He, K. L. Wang, J. Q. Wei, F. Y. Kang and H. W. Zhu, *Nanoscale*, 2015, **7**, 7318-7322.
- 21 S. T. Senthilkumar, N. Fu, Y. Liu, Y. Wang, L. Zhou and H. Huang, *Electrochim. Acta*, 2016, **211**, 411-419.

- 22 X. Long, Z. Zeng, E. Guo, X. Shi, H. Zhou and X. Wang, *J. Power Sources*, 2016, **325**, 264-272.
- 23 C. Zhang, T. M. Higgins, S.-H. Park, S. E. O'Brien, D. Long, J. N. Coleman and V. Nicolosi, *Nano Energy*, 2016, **28**, 495-505.
- 24 J. Cherusseri and K. K. Kar, *RSC Adv.*, 2016, **6**, 60454-60466.
- 25 C. Wei, Q. Xu, Z. Chen, W. Rao, L. Fan, Y. Yuan, Z. Bai and J. Xu, *Carbohydr. Polym.*, 2017, **169**, 50-57.
- 26 G. K. Veerasubramani, A. Chandrasekhar, S. M. S. P, Y. S. Mok and S. J. Kim, *J. Mater. Chem. A*, 2017, **5**, 11100-11113.
- 27 H. Heydari and M. B. Gholivand, *New J. Chem.*, 2017, **41**, 237-244.
- 28 W. Qi, X. Li, Y. Wu, H. Zeng, C. Kuang, S. Zhou, S. Huang and Z. Yang, *Surf. Coat. Technol.*, 2017, **320**, 624-629.
